# Supplementary material
Source: HighWire-hosted journal article supplement (https://bmjopenquality.bmj.com/highwire/filestream/136019/field_highwire_adjunct_files/0/ds1859.docx)
Supplement: ds1859.docx [file ds1859.docx]

|  | **Date** | **Indication** | **Type** | **Make/Model** | **Route** | **Complications** | **CXR** | **Check** | **F/U** | **CC Cardio** |
| --- | --- | --- | --- | --- | --- | --- | --- | --- | --- | --- |
| **Pre Proforma**  **(%)** | 30 | 50 | 90 | 0 | 10 | 70 | 90 | 90 | 100 | 0 |

Fig 1. Percentage of discharge letters containing required information prior to introduction of proforma
